# Supplementary material
Source: publisher figshare collection journal article supplement (https://acs.figshare.com/ndownloader/files/3781867)
Supplement: Supplementary file 1 [file 3781867]

## SUPPORTING INFORMATION

### **Toxicogenomic responses of the model legume *Medicago truncatula* to aged biosolids containing a mixture of nanomaterials (TiO<sub>2</sub>, Ag and ZnO) from a pilot wastewater treatment plant**

**Chun Chen<sup>1,2,3\*</sup>, Jason M. Unrine<sup>1,2,3</sup>, Jonathan D. Judy<sup>1,2,3,4</sup>, Ricky W. Lewis<sup>1,2</sup>, Jing Guo<sup>5</sup>,  
David H. McNear Jr.<sup>1,2</sup>, Olga V. Tsyusko<sup>1,2,3\*</sup>**

<sup>1</sup>Department of Plant and Soil Sciences, University of Kentucky, Lexington Kentucky 40546, United States

<sup>2</sup>Transatlantic Initiative for Nanotechnology and the Environment (TINE), University of Kentucky, Lexington, Kentucky, 40546, United States

<sup>3</sup>Center for the Environmental Implications for Nanotechnology (CEINT), Duke University, Durham, North Carolina 27708, United States

<sup>4</sup>CSIRO Land and Water, Waite Campus, Urrbrae, South Australia 5064, Australia

<sup>5</sup>Departments of Epidemiology and Biostatistics, University of Kentucky, Lexington Kentucky 40536, United States

\* To whom correspondence may be addressed

Chun Chen  
University of Kentucky  
Lexington, KY, 40504  
859-257-1978  
[chun.chen@uky.edu](mailto:chun.chen@uky.edu)

Olga V. Tsyusko  
University of Kentucky  
Lexington, KY, 40504  
859-257-1777  
[olga.tsyusko@uky.edu](mailto:olga.tsyusko@uky.edu)

**Quantitative Reverse Transcription PCR (qRT-PCR).** 4 genes in the shoots and 5 genes in the roots were selected from differentially expressed genes (DEGs) in the microarray analysis for qRT-PCR verification. Briefly, RNA was extracted using the same protocols as described above for the microarray samples. cDNA was transcribed from 800 ng of total RNA, using a high-capacity cDNA reverse transcription kit (Applied Biosystems) in a total volume of 20  $\mu$ L per reaction. The qRT-PCR was performed in a 10  $\mu$ L reaction mixture containing 5  $\mu$ L of TaqMan Fast Universal PCR Master Mix, 0.5  $\mu$ L of TaqMan gene expression assay consisting of forward and reverse primers and FAM<sup>TM</sup> dye-labeled TaqMan probe, 3.5  $\mu$ L of RNase-free water and 1  $\mu$ L of a 1:5 dilution of each cDNA sample (Applied Biosystems). The primers and Taqman probes were designed using Applied Biosystem Primer Express software v3.0 and then synthesized by Applied Biosystems. The primer and probe sequence used in qRT-PCR assays were listed in the Supporting Information (Table S1). The following qRT-PCR reactions were performed on a StepOne Plus system (Applied Biosystems) for 20 s at 95 °C, followed by 40 cycles of 95 °C for 1 s and 60 °C for 20 s. All samples were run in triplicates for each gene with reverse transcriptase minus (-RT) negative control to check for DNA contaminations. Actin 2 was selected as a reference gene for relative quantification, which showed stable expression within the microarray data and qRT-PCR confirmation. The qRT-PCR data was analyzed and normalized with the reference gene (Actin 2) using a GenEx software (Multi D). After normalization, fold changes in gene expression in bulk/dissolved and ENM treatments were calculated relative to controls.

**Stability of the Reference Genes.** An equivalent amount of total RNA from *Medicago truncatula* which exposed to control, bulk/dissolved and ENM treatment, was converted to cDNA and the cDNA diluted up to 5-fold for qRT-PCR. The amplification curves of Actin 2 gene under different treatments showed stable expression, indicating it can be used as a reference gene for relative quantification in our study.

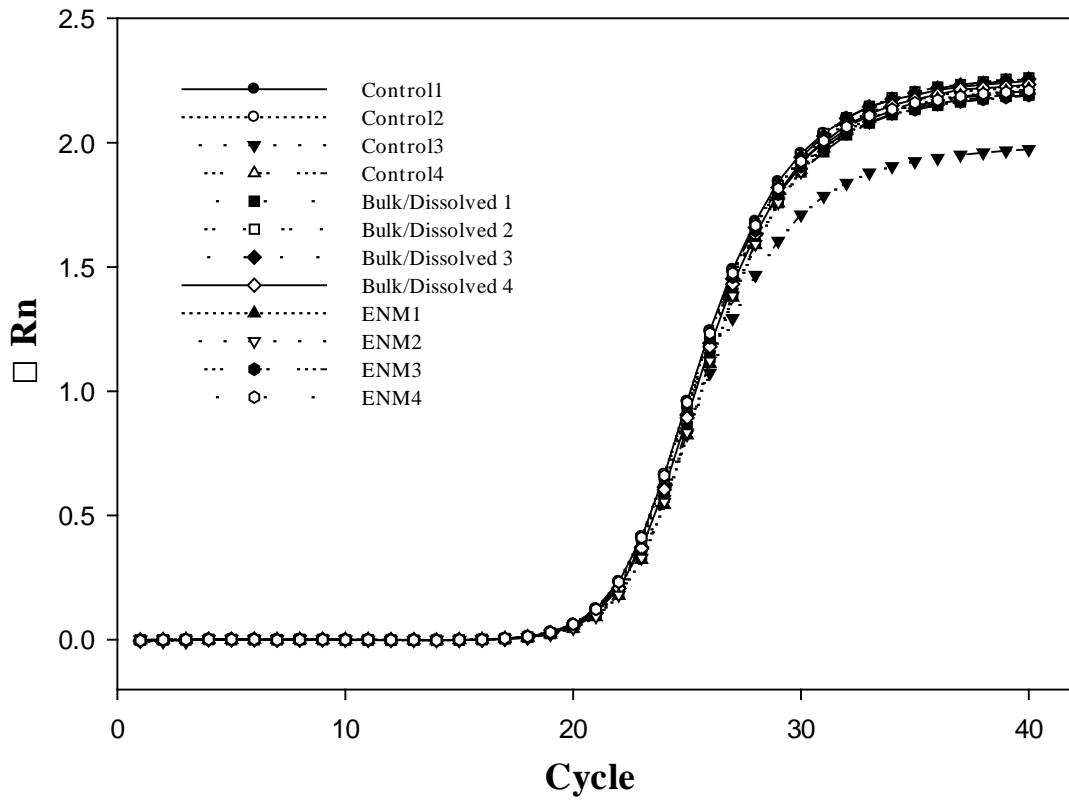

**Figure S1.** The quantitative real-time PCR (qRT-PCR) amplification curves of Actin 2 gene expression in control, bulk/dissolved and ENM treatments

**Table S1.** Taqman primers and probes for confirming individual gene expression

| genes                   | probeset          | primers and probe sequences 5' to 3' |                           | amplicon size / bp | PCR efficiency | R <sup>2</sup> |
|-------------------------|-------------------|--------------------------------------|---------------------------|--------------------|----------------|----------------|
| <u>reference gene</u>   |                   |                                      |                           |                    |                |                |
| Actin 2                 |                   | Forward                              | CTGTGCCAATCTATGAGGGTTATG  | 63                 | 98.52%         | 0.999          |
|                         |                   | Reverse                              | GACCAGCAAGATCCAAACGAA     |                    |                |                |
|                         |                   | Probe                                | ACTCCCACATGCCATC          |                    |                |                |
| <u>shoots (4 genes)</u> |                   |                                      |                           |                    |                |                |
| IFR                     | Mtr.410.1.S1_s_at | Forward                              | CACGCCTTTACCGGTTACTTCT    | 66                 | 96.46%         | 0.999          |
|                         |                   | Reverse                              | ATCCCGAGGAGGATCAGTGA      |                    |                |                |
|                         |                   | Probe                                | ACGTAACTTGGCTCAACT        |                    |                |                |
| F3H                     | Mtr.13960.1.S1_at | Forward                              | GGCTTCGTATGGTCCAACTTCT    | 70                 | 95.61%         | 0.998          |
|                         |                   | Reverse                              | AGTCCATTTTCAAGTTCCCAATCA  |                    |                |                |
|                         |                   | Probe                                | ACAGCTACACTGGCCCA         |                    |                |                |
| GST                     | Mtr.43621.1.S1_at | Forward                              | TGCATTTTCTTTTGAGGTTCCA    | 70                 | 95.04%         | 0.999          |
|                         |                   | Reverse                              | CAGGGACGGGTAAGACAGAAAC    |                    |                |                |
|                         |                   | Probe                                | TTATGTACGACGTCCGTTGC      |                    |                |                |
| P450                    | Mtr.12616.1.S1_at | Forward                              | AGCACTCACCTTCCAATAACCAA   | 66                 | 94.76%         | 0.996          |
|                         |                   | Reverse                              | CCATGAACACCATTGCAAATTC    |                    |                |                |
|                         |                   | Probe                                | ACTACCGTCTCTACTCTAT       |                    |                |                |
| <u>roots (5 genes)</u>  |                   |                                      |                           |                    |                |                |
| MTP                     | Mtr.37075.1.S1_at | Forward                              | CAATCTGCACCTCCTGAACTTCT   | 70                 | 95.18%         | 0.999          |
|                         |                   | Reverse                              | TGCGCTTAATTTGAGAGTGCAT    |                    |                |                |
|                         |                   | Probe                                | CAGAAGCTAACGTATCTTTGTCAT  |                    |                |                |
| MTR                     | Mtr.17288.1.S1_at | Forward                              | ATGCCGCACAATCTTTTCCT      | 67                 | 98.61%         | 0.999          |
|                         |                   | Reverse                              | CGCGCTTGGTACCAGGTATT      |                    |                |                |
|                         |                   | Probe                                | CACTCTGCTCTAGTGCTA        |                    |                |                |
| PEROX                   | Mtr.14635.1.S1_at | Forward                              | GCAAGCAGAGATGCAGCAAA      | 67                 | 91.06%         | 0.999          |
|                         |                   | Reverse                              | TTGCGATGAGTTGTGAGAAGTTAAA |                    |                |                |
|                         |                   | Probe                                | ATAAATCTTCCACCGGCATT      |                    |                |                |
| NADPH                   | Mtr.11719.1.S1_at | Forward                              | CATTAAATGTGGAGGAGCTTGGA   | 67                 | 91.87%         | 0.999          |
|                         |                   | Reverse                              | ACCGATAGGCGAAGGATTTGA     |                    |                |                |
|                         |                   | Probe                                | ACAGAAGCTCTACCAGTTG       |                    |                |                |
| Acc_Oxidase             | Mtr.46283.1.S1_at | Forward                              | TGGGAACCACAAAACATTCTGATA  | 72                 | 94.96%         | 0.999          |
|                         |                   | Reverse                              | GGAGGCCACCAATATGATCATC    |                    |                |                |
|                         |                   | Probe                                | TTGTTTTCTCACATTGCTTC      |                    |                |                |

**Table S2.** Quantitative real-time PCR (qRT-PCR) confirmation of fold changes in expression level for 9 representative genes determined by microarrays analysis.

| gene name                      | fold change           |                |                                  |                     |
|--------------------------------|-----------------------|----------------|----------------------------------|---------------------|
|                                | ENM <i>vs</i> control |                | bulk/dissolved <i>vs</i> control |                     |
|                                | microarray            | qRT-PCR        | microarray                       | qRT-PCR             |
| <b><u>shoots (4 genes)</u></b> |                       |                |                                  |                     |
| IFR                            | 1.93 ± 0.18*          | 3.43 ± 0.91*   | 1.07 ± 0.05                      | 1.79 ± 0.41         |
| F3H                            | 2.00 ± 0.21*          | 2.69 ± 0.44*   | 1.17 ± 0.01                      | 1.68 ± 0.26         |
| GST                            | 2.34 ± 0.29*          | 7.37 ± 1.17*   | 1.23 ± 0.04                      | 2.77 ± 0.27*        |
| P450                           | 2.66 ± 0.10*          | 2.70 ± 0.24*   | 1.59 ± 0.63                      | 1.64 ± 0.18*        |
| <b><u>roots (5 genes)</u></b>  |                       |                |                                  |                     |
| MTP                            | 14.32 ± 4.03*         | 9.02 ± 1.92*   | -1.15 (0.97 ± 0.14)              | -1.01 (0.99 ± 0.37) |
| MTR                            | 12.68 ± 1.3*          | 11.29 ± 1.81*  | -1.25 (0.80 ± 0.15)              | 1.08 ± 0.53         |
| PEROX                          | 42.20 ± 3.83*         | 23.92 ± 2.08*  | -1.53 (0.65 ± 0.06)              | 1.08 ± 0.10         |
| NADPH                          | 27.25 ± 3.76*         | 12.27 ± 1.06*  | -1.55 (0.64 ± 0.27)              | -1.39 (0.72 ± 0.07) |
| ACC_Oxidase                    | 56.85 ± 13.46*        | 64.07 ± 10.19* | -1.47 (0.68 ± 0.18)              | 1.56                |

Note: ENM, engineered nanomaterial. When comparing two groups, expression ratio ENM or Bulk/Dissolved (A) and Control (B), if A < B, the expression ratio and fold change are both A/B (up-regulation); if A > B, the expression ratio is still A/B, but fold change is -B/A (down-regulation). Microarray data represent the mean ± SEM (standard error of the mean) of *n* = 3 pooled specimens; qPCR data represent the mean ± SEM of *n* = 5 individual shoots (*n* = 3 individual pooled roots). The asterisk denotes a significant difference from the control (*P* < 0.05). For down-regulated genes, data in parentheses represent the average of expression ratio with SEM.

**Table S3.** Metabolic pathways significantly over-represented ( $P < 0.05$ , *FDR* correction) in shoots of *Medicago truncatula* exposed to ENM (engineered nanomaterial) treatment.

| pathways                                     | no. of Enzymes included in <i>M. truncatula</i> | no. of Differentially Expressed Enzymes | <i>P</i> -value |
|----------------------------------------------|-------------------------------------------------|-----------------------------------------|-----------------|
| Drug metabolism-cytochrome P450              | 6                                               | 5                                       | 0.0053          |
| Metabolism of xenobiotics by cytochrome P450 | 4                                               | 4                                       | 0.0053          |
| Flavonoid biosynthesis                       | 10                                              | 6                                       | 0.0055          |
| Isoflavonoid biosynthesis                    | 3                                               | 3                                       | 0.0247          |
| Starch and sucrose metabolism                | 33                                              | 10                                      | 0.0247          |

Supporting Information File S1 summarize the data of down-regulated and up-regulated differentially expression genes (DEGs) identified (based on greater than  $\pm 1.5$ -fold changes with  $P < 0.05$ ) in the shoots or roots of *Medicago truncatula* following ENM (engineered nanomaterial) or bulk/dissolved exposure.

Supporting Information File S2 summarize the results of gene ontology (GO) categories significantly enriched with all differentially expression genes (DEGS) in tissues (shoots and roots) of *Medicago truncatula* exposed to ENM (engineered nanomaterial) or bulk/dissolved treatments that compared to controls.

Supporting Information File S3 summarize the results of KEGG pathways significantly enriched with all differentially expression genes (DEGs) in tissues (shoots and roots) of *Medicago truncatula* exposed to ENM (engineered nanomaterial) or bulk/dissolved treatments that compared to controls.

Supporting Information File S4 summarize the results of the genes that were identified as significantly differentially expressed after applying FDR of 0.05 and 0.1 in tissues (shoots and roots) of *Medicago truncatula* exposed to ENM (engineered nanomaterial) or bulk/dissolved treatments that compared to controls.
